# Supplementary material for: A new family of NaTMGe (TM = 3d transition metals) half-Heusler compounds: the role of TM modification
Source: Royal Society of Chemistry journal article supplement (doi:10.1039/d2ra02983a), 2022-01-01
Supplement: d2ra02983a1.pdf [file d2ra02983a1.pdf]

## New family of NaTMGe (TM = 3d transition metals) half-Heusler compounds: the role of TM modification

Tuan V. Vu<sup>a</sup>, Duy Khanh Nguyen<sup>b</sup>, J. Guerrero-Sanchez<sup>c</sup>, J. F. Rivas-Silva<sup>d</sup>, Gregorio H. Coccoletzi<sup>d</sup>, D. M. Hoat<sup>e,f,\*</sup>

<sup>a</sup>Faculty of Mechanical-Electrical and Computer Engineering, School of Engineering and Technology, Van Lang University, Ho Chi Minh City, Vietnam

<sup>b</sup>High-Performance Computing Lab (HPC Lab), Information Technology Center, Thu Dau Mot University, Binh Duong Province, Vietnam

<sup>c</sup>Universidad Nacional Autónoma de México, Centro de Nanociencias y Nanotecnología, Apartado Postal 14, Ensenada, Baja California, Código Postal 22800, Mexico

<sup>d</sup>Benemérita Universidad Autónoma de Puebla, Instituto de Física, Apartado Postal J-48, Puebla 72570, Mexico

<sup>e</sup>Institute of Theoretical and Applied Research, Duy Tan University, Ha Noi 100000, Viet Nam

<sup>f</sup>Faculty of Natural Sciences, Duy Tan University, Da Nang 550000, Viet Nam

\*Corresponding author: [dominhhoat@duytan.edu.vn](mailto:dominhhoat@duytan.edu.vn)

Table S1: Spin-up/spin-down band gap  $E_g$  (eV) and magnetic moments  $\mu$  (T: total; I: interstitial) ( $\mu_B$ ) of NaTMGe half-Heusler compounds calculated with mBJ-GGA+U(mBJ-GGA).

|                | $E_g$                | $\mu$      |             |              |            |              |
|----------------|----------------------|------------|-------------|--------------|------------|--------------|
|                |                      | T          | I           | Na           | TM         | Ge           |
| <b>TM = V</b>  | 0.64/1.13(0.12/1.12) | 2.00(2.00) | 0.02(0.10)  | -0.03(-0.01) | 2.18(2.07) | -0.17(-0.15) |
| <b>TM = Cr</b> | M/2.01(M/1.70)       | 3.00(3.00) | -0.17(0.02) | -0.08(-0.04) | 3.98(3.52) | -0.74(-0.50) |
| <b>TM = Mn</b> | M/1.77(M/1.53)       | 4.00(4.00) | -0.10(0.14) | -0.02(-0.01) | 4.56(4.21) | -0.44(-0.34) |
| <b>TM = Fe</b> | M/M(M/M)             | 3.53(3.03) | 0.15(0.10)  | 0.02(0.02)   | 3.44(3.02) | -0.07(-0.10) |

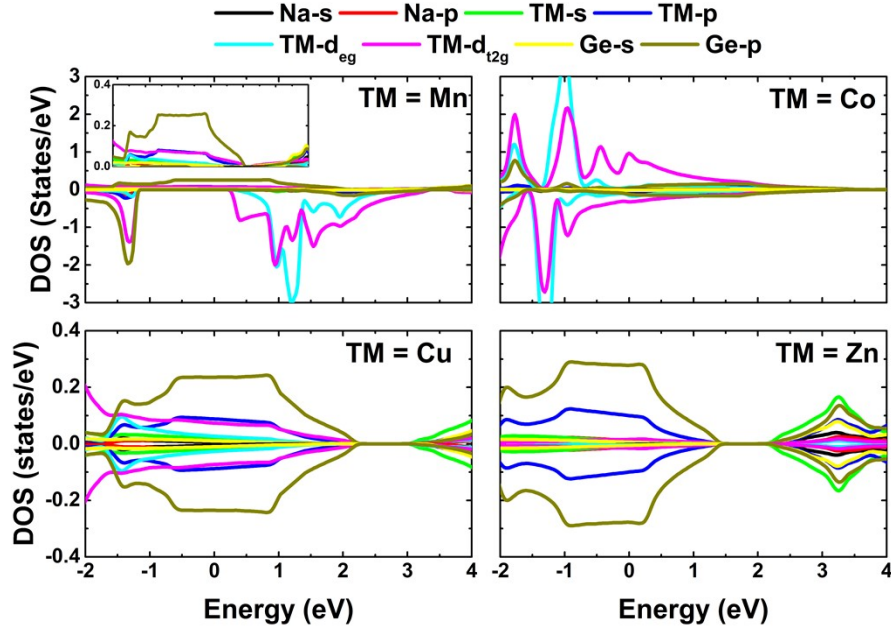

Figure S1: Projected density of states of NaMnGe, NaCoGe, NaCuGe, and NaZnGe half-Heusler compounds.

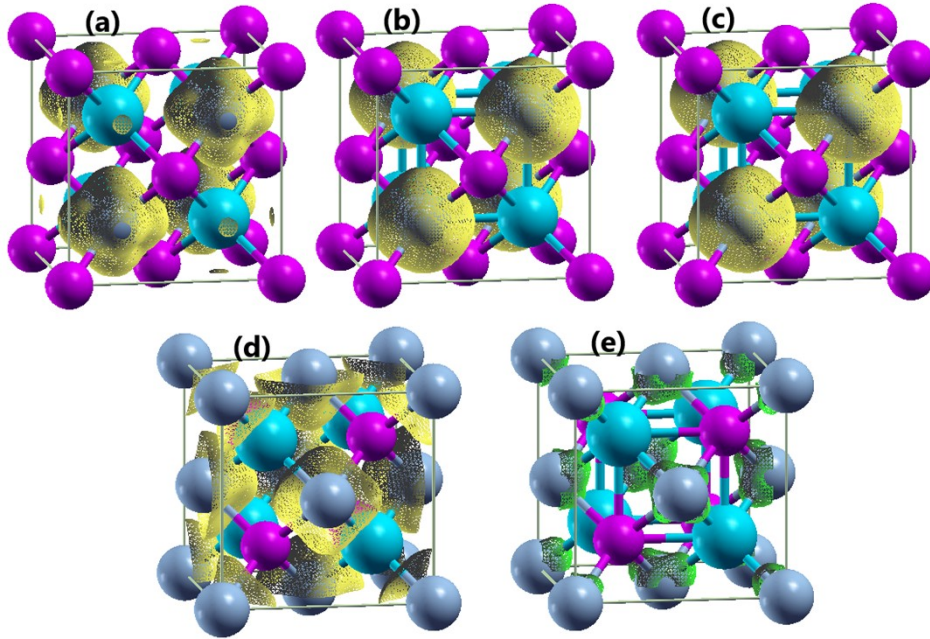

Figure S2: Spin density in NaTMGe half-Heusler compounds (Yellow isosurface: spin-up; Green isosurfa: spin-down; Isosurface value:  $0.02 \text{ e}/\text{\AA}^3$ ) with (a) TM = V, (b) TM = Cr, (c) TM = Mn, (d) TM = Fe, and (e) TM = Co.

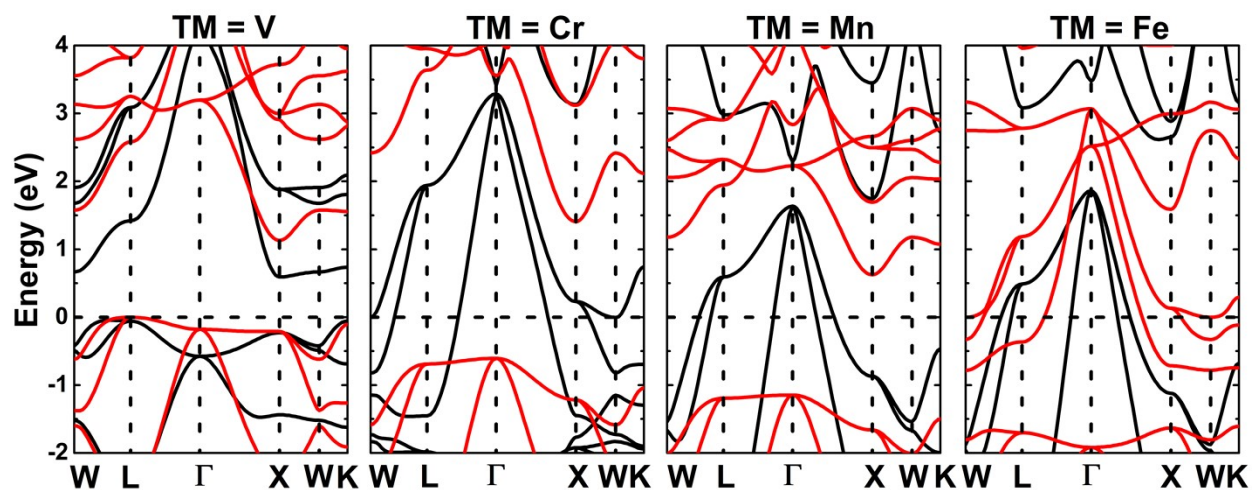

Figure S3: Electronic band structure of NaTMGe half-Heusler compounds (Black line: Spin-up; Red line: Spin-down) calculated by mBJ-GGA+U.

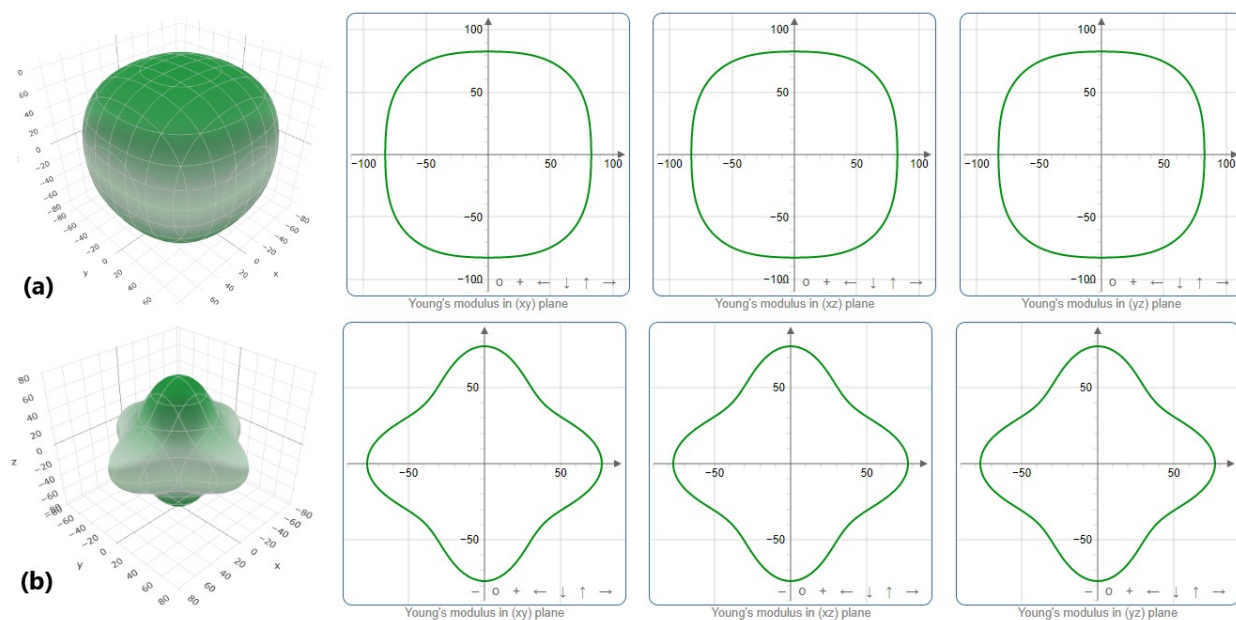

Figure S4: Directional dependence of Young modulus of (a) NaTiGe and (b) NaVGe half-Heusler compounds.

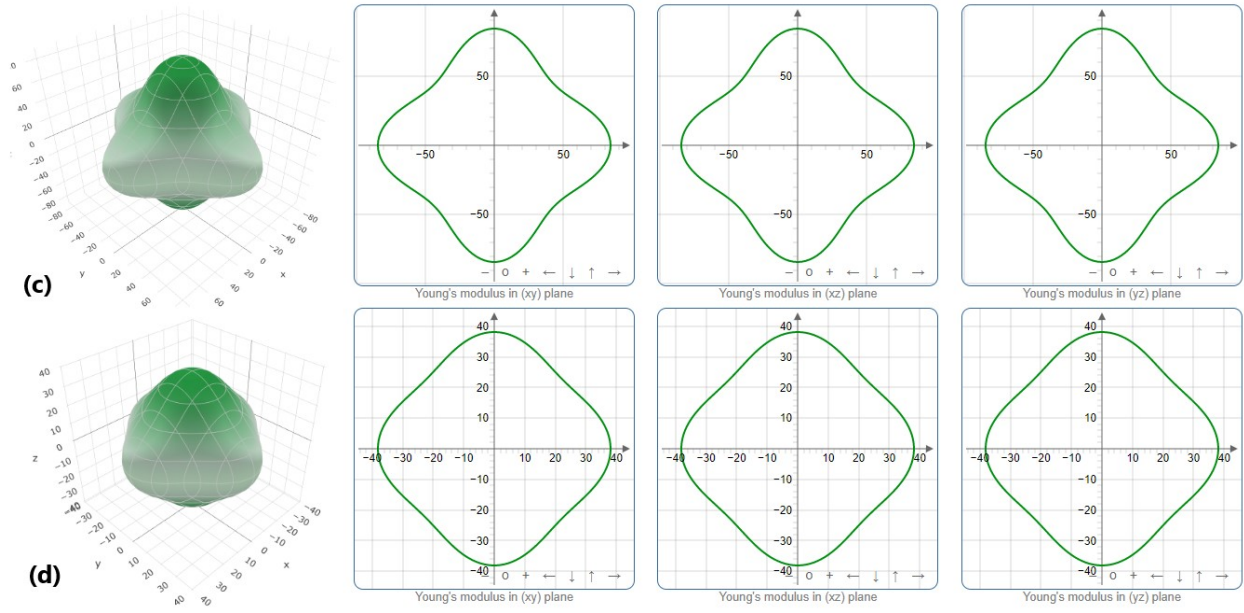

Figure S4 (Cont): (c) NaCrGe and (d) NaMnGe.

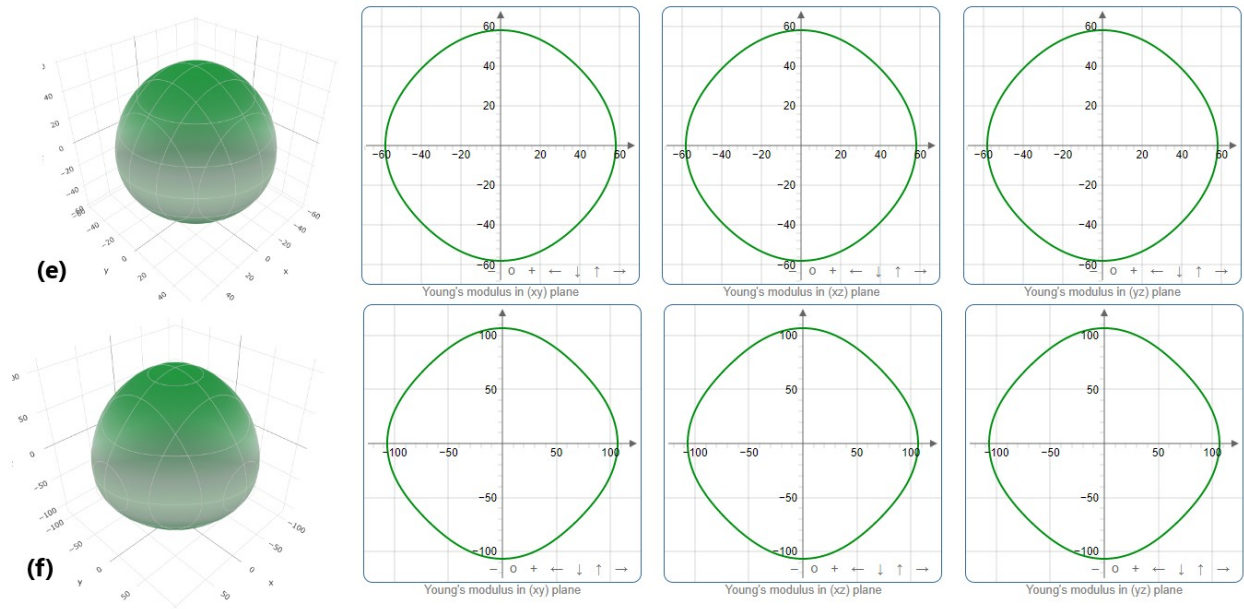

Figure S4 (Cont): (e) NaFeGe and (f) NaCoGe.



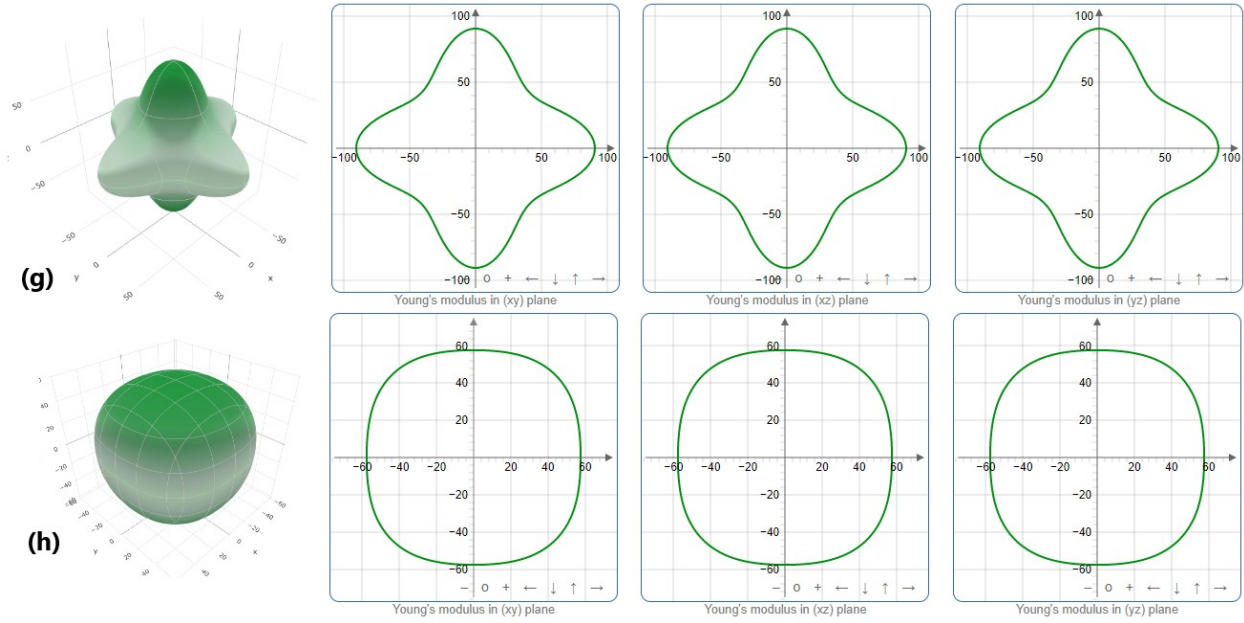

Figure S4 (Cont): (g) NaNiGe and (h) NaCuGe.
